# Supplementary material for: The best regimens for chemo-naïve incurable non-squamous non-small cell lung cancer with a programmed death-ligand 1, tumor proportion score 1–49%: a network meta-analysis
Source: PubMed Central journal article supplement — Transl Lung Cancer Res. 2021 Aug;10(8):3550–66. doi: 10.21037/tlcr-21-419 (PMC8435382; doi:10.21037/tlcr-21-419), 2021-08
Supplement: tlcr-10-08-3550-supplementary.pdf [file tlcr-10-08-3550-supplementary.pdf]

## Appendix 1

### The amendments to information in the protocol

- ❖ OR of objective response rate was not evaluated;
- ❖ The populations with TPS 0% were excluded.

## Appendix 2

### Search formulas

#### *MEDLINE*

(non-small OR squamous OR adenocarcinoma OR non-squamous OR NSCLC) AND (lung cancer OR lung carcinoma OR lung malignancy OR lung tumor OR NSCLC) AND (advanced OR metastasis OR recurrent OR recurrence OR inoperable OR relapsed OR incurable OR stage 3 OR stage 3a OR stage 3b OR stage III OR stage IIIa OR stage IIIb OR stage 4 OR stage 4a OR stage 4b OR stage IV OR stage IVa OR stage IVb) AND (naïve OR untreated OR chemo naïve OR chemo-naïve OR non-treated OR nontreated OR first-line OR front-line OR initial treatment OR “previously not treated”) AND (randomised[title] OR randomized[title] OR randomly OR phase 3[title] OR phase III[title] OR RCT[title] OR (nejm AND (randomized OR randomly OR phase 3 OR phase III OR RCT))).

## Appendix 3

### References

1. Belani CP, Chakraborty BC, Modi RI, et al. A randomized trial of TLR-2 agonist CADI-05 targeting desmocollin-3 for advanced non-small-cell lung cancer. *Ann Oncol* 2017;28:298-304.
2. Bennouna J, Havel L, Krzakowski M, et al. Oral vinorelbine plus cisplatin as first-line chemotherapy in nonsquamous non-small-cell lung cancer: final results of an International randomized phase II study (NAVotrial 01). *Clin Lung Cancer* 2014;15:258-65.
3. Carbone DP, Reck M, Paz-Ares L, et al. First-Line Nivolumab in Stage IV or Recurrent Non-Small-Cell Lung Cancer. *N Engl J Med* 2017;376:2415-26.
4. Chang JW, Tsao TC, Yang CT, et al. A randomized study of gemcitabine plus cisplatin and vinorelbine plus cisplatin in patients with advanced non-small-cell lung cancer. *Chang Gung Med J* 2008;31:559-66.
5. Chen YM, Perng RP, Shih JF, et al. A randomised phase II study of weekly paclitaxel or vinorelbine in combination with cisplatin against inoperable non-small-cell lung cancer previously untreated. *Br J Cancer* 2004;90:359-65.
6. Chen YM, Perng RP, Shih JF, et al. A randomized phase II study of docetaxel or vinorelbine in combination with cisplatin against inoperable, chemo-naïve non-small-cell lung cancer in Taiwan. *Lung Cancer* 2007;56:363-9.
7. Comella P, Frasci G, Panza N, et al. Randomized trial comparing cisplatin, gemcitabine, and vinorelbine with either cisplatin and gemcitabine or cisplatin and vinorelbine in advanced non-small-cell lung cancer: interim analysis of a phase III trial of the Southern Italy Cooperative Oncology Group. *J Clin Oncol* 2000;18:1451-7.
8. Doebele RC, Spigel D, Tehfe M, et al. Phase 2, randomized, open-label study of ramucirumab in combination with first-line pemetrexed and platinum chemotherapy in patients with nonsquamous, advanced/metastatic non-small cell lung cancer. *Cancer* 2015;121:883-92.
9. Douillard JY, Gervais R, Dabouis G, et al. Sequential two-line strategy for stage IV non-small-cell lung cancer: docetaxel-cisplatin versus vinorelbine-cisplatin followed by cross-over to single-agent docetaxel or vinorelbine at progression: final results of a randomised phase II study. *Ann Oncol* 2005;16:81-9.

10. Edelman MJ, Clark JI, Chansky K, et al. Randomized phase II trial of sequential chemotherapy in advanced non-small cell lung cancer (SWOG 9806): carboplatin/gemcitabine followed by paclitaxel or cisplatin/vinorelbine followed by docetaxel. *Clin Cancer Res* 2004;10:5022-6.
11. Engel-Riedel W, Lowe J, Mattson P, et al. A randomized, controlled trial evaluating the efficacy and safety of BTH1677 in combination with bevacizumab, carboplatin, and paclitaxel in first-line treatment of advanced non-small cell lung cancer. *J Immunother Cancer* 2018;6:16.
12. Fossella F, Pereira JR, von Pawel J, et al. Randomized, multinational, phase III study of docetaxel plus platinum combinations versus vinorelbine plus cisplatin for advanced non-small-cell lung cancer: the TAX 326 study group. *J Clin Oncol* 2003;21:3016-24.
13. Galetta D, Cinieri S, Pisconti S, et al. Cisplatin/Pemetrexed Followed by Maintenance Pemetrexed Versus Carboplatin/Paclitaxel/Bevacizumab Followed by Maintenance Bevacizumab in Advanced Nonsquamous Lung Cancer: The GOIM (Gruppo Oncologico Italia Meridionale) ERACLE Phase III Randomized Trial. *Clin Lung Cancer* 2015;16:262-73.
14. Gandhi L, Rodríguez-Abreu D, Gadgeel S, et al. Pembrolizumab plus Chemotherapy in Metastatic Non-Small-Cell Lung Cancer. *N Engl J Med* 2018;378:2078-92.
15. Garon EB, Neidhart JD, Gabrail NY, et al. A randomized Phase II trial of the tumor vascular disrupting agent CA4P (fosbretabulin tromethamine) with carboplatin, paclitaxel, and bevacizumab in advanced nonsquamous non-small-cell lung cancer. *Onco Targets Ther* 2016;9:7275-83.
16. Gebbia V, Lorusso V, Galetta D, et al. First-line cisplatin with docetaxel or vinorelbine in patients with advanced non-small-cell lung cancer: a quality of life directed phase II randomized trial of Gruppo Oncologico Italia Meridionale. *Lung Cancer* 2010;69:218-24.
17. Gebbia V, Galetta D, Caruso M, et al. Gemcitabine and cisplatin versus vinorelbine and cisplatin versus ifosfamide+gemcitabine followed by vinorelbine and cisplatin versus vinorelbine and cisplatin followed by ifosfamide and gemcitabine in stage IIIB-IV non small cell lung carcinoma: a prospective randomized phase III trial of the Gruppo Oncologico Italia Meridionale. *Lung Cancer* 2003;39:179-89.
18. Grønberg BH, Bremnes RM, Fløtten O, et al. Phase III study by the Norwegian lung cancer study group: pemetrexed plus carboplatin compared with gemcitabine plus carboplatin as first-line chemotherapy in advanced non-small-cell lung cancer. *J Clin Oncol* 2009;27:3217-24.
19. Harada T, Udagawa H, Sugiyama E, et al. P1.01-33 Randomized Phase 2 Study Comparing CBDCA+PTX+BEV and CDDP+PEM+BEV in Treatment-Naïve Advanced Non-Sq NSCLC (CLEAR study). *J Thorac Oncol* 2018;13:S472-3.
20. Helbekkmo N, Sundstrøm SH, Aasebø U, et al. Vinorelbine/carboplatin vs gemcitabine/carboplatin in advanced NSCLC shows similar efficacy, but different impact of toxicity. *Br J Cancer* 2007;97:283-9.
21. Hellmann MD, Paz-Ares L, Bernabe Caro R, et al. Nivolumab plus Ipilimumab in Advanced Non-Small-Cell Lung Cancer. *N Engl J Med* 2019;381:2020-31.
22. Herbst RS, Giaccone G, de Marinis F, et al. Atezolizumab for First-Line Treatment of PD-L1-Selected Patients with NSCLC. *N Engl J Med* 2020;383:1328-39.
23. Kader YA, Le Chevalier T, El-Nahas T, et al. Comparative study analyzing survival and safety of bevacizumab/carboplatin/paclitaxel and cisplatin/pemetrexed in chemotherapy-naïve patients with advanced non-squamous bronchogenic carcinoma not harboring EGFR mutation. *Onco Targets Ther* 2013;6:803-9.
24. Kaira K, Imai H, Souma R, et al. An Exploratory Randomized Phase II Trial Comparing CDDP Plus S-1 With Bevacizumab and CDDP Plus Pemetrexed With Bevacizumab Against Patients With Advanced Non-squamous Non-small Cell Lung Cancer. *Anticancer Res* 2019;39:2483-91.
25. Kawahara M, Atagi S, Komuta K, et al. Carboplatin plus either docetaxel or paclitaxel for Japanese patients with advanced non-small cell lung cancer. *Anticancer Res* 2013;33:4631-7.
26. Khodadad K, Khosravi A, Esfahani-Monfared Z, et al. Comparing docetaxel plus Cisplatin with Paclitaxel plus Carboplatin in chemotherapy-naïve patients with advanced non-small-cell lung cancer: a single institute study. *Iran J Pharm Res* 2014;13:575-81.
27. Kubota K, Sakai H, Katakami N, et al. A randomized phase III trial of oral S-1 plus cisplatin versus docetaxel plus cisplatin in Japanese patients with advanced non-small-cell lung cancer: TCOG0701 CATS trial. *Ann Oncol* 2015;26:1401-8.
28. Langer CJ, Gadgeel SM, Borghaei H, et al. Carboplatin and pemetrexed with or without pembrolizumab for advanced, non-

- squamous non-small-cell lung cancer: a randomised, phase 2 cohort of the open-label KEYNOTE-021 study. *Lancet Oncol* 2016;17:1497-508.
29. Lee JS, Sugawara S, Kang JH, et al. LBA54 Randomized phase III trial of nivolumab in combination with carboplatin, paclitaxel, and bevacizumab as first-line treatment for patients with advanced or recurrent non-squamous NSCLC. *Ann Oncol* 2020;31:S1184-5.
  30. Martoni A, Marino A, Sperandi F, et al. Multicentre randomised phase III study comparing the same dose and schedule of cisplatin plus the same schedule of vinorelbine or gemcitabine in advanced non-small cell lung cancer. *Eur J Cancer* 2005;41:81-92.
  31. Melosky B, Bradbury P, Tu D, et al. Selumetinib in patients receiving standard pemetrexed and platinum-based chemotherapy for advanced or metastatic KRAS wildtype or unknown non-squamous non-small cell lung cancer: A randomized, multicenter, phase II study. Canadian Cancer Trials Group (CCTG) IND.219. *Lung Cancer* 2019;133:48-55.
  32. Minami S, Kijima T, Shiroyama T, et al. Randomized Phase II trial of paclitaxel and carboplatin followed by gemcitabine switch-maintenance therapy versus gemcitabine and carboplatin followed by gemcitabine continuation-maintenance therapy in previously untreated advanced non-small cell lung cancer. *BMC Res Notes* 2013;6:3.
  33. Mok TSK, Wu YL, Kudaba I, et al. Pembrolizumab versus chemotherapy for previously untreated, PD-L1-expressing, locally advanced or metastatic non-small-cell lung cancer (KEYNOTE-042): a randomised, open-label, controlled, phase 3 trial. *Lancet* 2019;393:1819-30.
  34. Niho S, Kunitoh H, Nokihara H, et al. Randomized phase II study of first-line carboplatin-paclitaxel with or without bevacizumab in Japanese patients with advanced non-squamous non-small-cell lung cancer. *Lung Cancer* 2012;76:362-7.
  35. Novello S, Scagliotti G, de Castro G Jr, et al. An Open-Label, Multicenter, Randomized, Phase II Study of Cisplatin and Pemetrexed With or Without Cixutumumab (IMC-A12) as a First-Line Therapy in Patients With Advanced Nonsquamous Non-Small Cell Lung Cancer. *J Thorac Oncol* 2017;12:383-9.
  36. Ohe Y, Ohashi Y, Kubota K, et al. Randomized phase III study of cisplatin plus irinotecan versus carboplatin plus paclitaxel, cisplatin plus gemcitabine, and cisplatin plus vinorelbine for advanced non-small-cell lung cancer: Four-Arm Cooperative Study in Japan. *Ann Oncol* 2007;18:317-23.
  37. Okamoto I, Yoshioka H, Morita S, et al. Phase III trial comparing oral S-1 plus carboplatin with paclitaxel plus carboplatin in chemotherapy-naïve patients with advanced non-small-cell lung cancer: results of a west Japan oncology group study. *J Clin Oncol* 2010;28:5240-6.
  38. Ouyang X, Shi M, Jie F, et al. Phase III study of dulanermin (recombinant human tumor necrosis factor-related apoptosis-inducing ligand/Apo2 ligand) combined with vinorelbine and cisplatin in patients with advanced non-small-cell lung cancer. *Invest New Drugs* 2018;36:315-22.
  39. Papadimitrakopoulou V, Cobo M, Bordoni R, et al. IMpower132: PFS and safety results with 1L atezolizumab+ carboplatin/ cisplatin+ pemetrexed in stage IV non-squamous NSCLC. *J Thorac Oncol* 2018;13:S332-3.
  40. Patel JD, Socinski MA, Garon EB, et al. PointBreak: a randomized phase III study of pemetrexed plus carboplatin and bevacizumab followed by maintenance pemetrexed and bevacizumab versus paclitaxel plus carboplatin and bevacizumab followed by maintenance bevacizumab in patients with stage IIIB or IV nonsquamous non-small-cell lung cancer. *J Clin Oncol* 2013;31:4349-57.
  41. Paz-Ares L, Ciuleanu TE, Cobo M, et al. First-line nivolumab plus ipilimumab combined with two cycles of chemotherapy in patients with non-small-cell lung cancer (CheckMate 9LA): an international, randomised, open-label, phase 3 trial. *Lancet Oncol* 2021;22:198-211.
  42. Ramalingam SS, Blais N, Mazieres J, et al. Randomized, Placebo-Controlled, Phase II Study of Veliparib in Combination with Carboplatin and Paclitaxel for Advanced/Metastatic Non-Small Cell Lung Cancer. *Clin Cancer Res* 2017;23:1937-44.
  43. Reck M, von Pawel J, Zatloukal P, et al. Phase III trial of cisplatin plus gemcitabine with either placebo or bevacizumab as first-line therapy for nonsquamous non-small-cell lung cancer: AVAIL. *J Clin Oncol* 2009;27:1227-34.
  44. Rizvi NA, Cho BC, Reinmuth N, et al. Durvalumab With or Without Tremelimumab vs Standard Chemotherapy in First-line Treatment of Metastatic Non-Small Cell Lung Cancer: The MYSTIC Phase 3 Randomized Clinical Trial. *JAMA Oncol* 2020;6:661-74.
  45. Rodrigues-Pereira J, Kim JH, Magallanes M, et al. A randomized phase 3 trial comparing pemetrexed/carboplatin and docetaxel/ carboplatin as first-line treatment for advanced, nonsquamous non-small cell lung cancer. *J Thorac Oncol* 2011;6:1907-14.

46. Sandler A, Gray R, Perry MC, et al. Paclitaxel-carboplatin alone or with bevacizumab for non-small-cell lung cancer. *N Engl J Med* 2006;355:2542-50.
47. Scagliotti GV, Parikh P, von Pawel J, et al. Phase III study comparing cisplatin plus gemcitabine with cisplatin plus pemetrexed in chemotherapy-naïve patients with advanced-stage non-small-cell lung cancer. *J Clin Oncol* 2008;26:3543-51.
48. Scagliotti GV, De Marinis F, Rinaldi M, et al. Phase III randomized trial comparing three platinum-based doublets in advanced non-small-cell lung cancer. *J Clin Oncol* 2002;20:4285-91.
49. Schiller JH, Harrington D, Belani CP, et al. Comparison of four chemotherapy regimens for advanced non-small-cell lung cancer. *N Engl J Med* 2002;346:92-8.
50. Smit EF, van Meerbeek JP, Lianes P, et al. Three-arm randomized study of two cisplatin-based regimens and paclitaxel plus gemcitabine in advanced non-small-cell lung cancer: a phase III trial of the European Organization for Research and Treatment of Cancer Lung Cancer Group--EORTC 08975. *J Clin Oncol* 2003;21:3909-17.
51. Socinski MA, Jotte RM, Cappuzzo F, et al. Atezolizumab for First-Line Treatment of Metastatic Nonsquamous NSCLC. *N Engl J Med* 2018;378:2288-301.
52. Spigel DR, Shipley DL, Waterhouse DM, et al. A Randomized, Double-Blinded, Phase II Trial of Carboplatin and Pemetrexed with or without Apatorsen (OGX-427) in Patients with Previously Untreated Stage IV Non-Squamous-Non-Small-Cell Lung Cancer: The SPRUCE Trial. *Oncologist* 2019;24:e1409-16.
53. Sun JM, Ahn JS, Jung SH, et al. Pemetrexed Plus Cisplatin Versus Gemcitabine Plus Cisplatin According to Thymidylate Synthase Expression in Nonsquamous Non-Small-Cell Lung Cancer: A Biomarker-Stratified Randomized Phase II Trial. *J Clin Oncol* 2015;33:2450-6.
54. Tan EH, Rolski J, Grodzki T, et al. Global Lung Oncology Branch trial 3 (GLOB3): final results of a randomised multinational phase III study alternating oral and i.v. vinorelbine plus cisplatin versus docetaxel plus cisplatin as first-line treatment of advanced non-small-cell lung cancer. *Ann Oncol* 2009;20:1249-56.
55. Thomas P, Robinet G, Gouva S, et al. Randomized multicentric phase II study of carboplatin/gemcitabine and cisplatin/vinorelbine in advanced non-small cell lung cancer GFPC 99-01 study (Groupe français de pneumo-cancérologie). *Lung Cancer* 2006;51:105-14.
56. Treat JA, Gonin R, Socinski MA, et al. A randomized, phase III multicenter trial of gemcitabine in combination with carboplatin or paclitaxel versus paclitaxel plus carboplatin in patients with advanced or metastatic non-small-cell lung cancer. *Ann Oncol* 2010;21:540-7.
57. von Pawel J, Spigel DR, Ervin T, et al. Randomized Phase II Trial of Parsatuzumab (Anti-EGFL7) or Placebo in Combination with Carboplatin, Paclitaxel, and Bevacizumab for First-Line Nonsquamous Non-Small Cell Lung Cancer. *Oncologist* 2018;23:654-e58.
58. West H, McCleod M, Hussein M, et al. Atezolizumab in combination with carboplatin plus nab-paclitaxel chemotherapy compared with chemotherapy alone as first-line treatment for metastatic non-squamous non-small-cell lung cancer (IMpower130): a multicentre, randomised, open-label, phase 3 trial. *Lancet Oncol* 2019;20:924-37.
59. Wheatley-Price P, Gadgeel S, Takahashi T, et al. Phase 1b/2 Randomized Study of MEDI-575 in Combination With Carboplatin Plus Paclitaxel Versus Carboplatin Plus Paclitaxel Alone in Adult Patients With Previously Untreated Advanced Non-Small-Cell Lung Cancer. *Clin Lung Cancer* 2019;20:e362-8.
60. Wu YL, Zhang L, Fan Y, et al. Randomized clinical trial of pembrolizumab vs chemotherapy for previously untreated Chinese patients with PD-L1-positive locally advanced or metastatic non-small-cell lung cancer: KEYNOTE-042 China Study. *Int J Cancer* 2021;148:2313-20.
61. Wu YL, Lu S, Cheng Y, et al. Efficacy and safety of pemetrexed/cisplatin versus gemcitabine/cisplatin as first-line treatment in Chinese patients with advanced nonsquamous non-small cell lung cancer. *Lung Cancer* 2014;85:401-7.
62. Yang Y, Wang Z, Fang J, et al. Efficacy and Safety of Sintilimab Plus Pemetrexed and Platinum as First-Line Treatment for Locally Advanced or Metastatic Nonsquamous NSCLC: a Randomized, Double-Blind, Phase 3 Study (Oncology pRogram by InnovENT anti-PD-1-11). *J Thorac Oncol* 2020;15:1636-46.
63. Yang JJ, Zhou Q, Liao RQ, et al. Nedaplatin/Gemcitabine Versus Carboplatin/Gemcitabine in Treatment of Advanced Non-small Cell Lung Cancer: A Randomized Clinical Trial. *Chin J Cancer Res* 2012;24:97-102.
64. Zhang X, Lu J, Xu J, et al. Pemetrexed plus platinum or gemcitabine plus platinum for advanced non-small cell lung cancer: final survival analysis from a multicentre randomized phase II trial in the East Asia region and a meta-analysis. *Respirology*

2013;18:131-9.

65. Zhou C, Wu YL, Chen G, et al. BEYOND: A Randomized, Double-Blind, Placebo-Controlled, Multicenter, Phase III Study of First-Line Carboplatin/Paclitaxel Plus Bevacizumab or Placebo in Chinese Patients With Advanced or Recurrent Nonsquamous Non-Small-Cell Lung Cancer. *J Clin Oncol* 2015;33:2197-204.
66. Zhou C, Chen G, Huang Y, et al. Camrelizumab plus carboplatin and pemetrexed versus chemotherapy alone in chemotherapy-naive patients with advanced non-squamous non-small-cell lung cancer (CameL): a randomised, open-label, multicentre, phase 3 trial. *Lancet Respir Med* 2021;9:305-14.
67. Zhu YM, Gan YL, Xu HY, et al. Clinical effectiveness of pemetrexed combined with cisplatin chemotherapy for advanced and maintenance treatment for patients with non-small-cell lung cancer. *Eur Rev Med Pharmacol Sci* 2018;22:1943-7.
68. Zinner RG, Obasaju CK, Spigel DR, et al. PRONOUNCE: randomized, open-label, phase III study of first-line pemetrexed + carboplatin followed by maintenance pemetrexed versus paclitaxel + carboplatin + bevacizumab followed by maintenance bevacizumab in patients with advanced nonsquamous non-small-cell lung cancer. *J Thorac Oncol* 2015;10:134-42.

## Appendix 4

### Characteristics of the included studies

The included studies were reported in a variety of countries worldwide. The United States of America had the most included studies (20 studies). The articles were published between 2000 and 2020. Among 68 reports, 37 were phase III studies, 26 evaluated OS as the primary endpoint, 43 included ECOG 0–1 cases. We regarded 3 studies as three-arm studies, 1 study as a four-arm study, and the other 64 as two-arm studies.

**Table S1** The Cochrane Risk of Bias evaluation sheet

| Study                     | Selection bias | Performance bias | Detection bias | Attrition bias | Reporting bias | Other bias |
|---------------------------|----------------|------------------|----------------|----------------|----------------|------------|
| Belani, 2017              | Low            | High             | Low            | Low            | Low            | Low        |
| Bennouna, 2014            | Unclear        | High             | Low            | Low            | Low            | High       |
| Carbone, 2017             | Low            | High             | Low            | Low            | Low            | High       |
| Chang, 2008               | Unclear        | High             | Low            | Low            | Low            | Low        |
| Chen, 2007                | Unclear        | High             | Low            | Low            | High           | Low        |
| Chen, 2004                | Unclear        | High             | Low            | Low            | Low            | Low        |
| Comella, 2000             | Low            | High             | Low            | Low            | Low            | Low        |
| Doebele, 2015             | Low            | High             | Low            | Low            | Low            | High       |
| Douillard, 2005           | Unclear        | High             | Low            | Low            | Low            | High       |
| Edelman, 2004             | Low            | High             | Low            | Low            | Low            | Low        |
| Engle-Riedel, 2018        | Low            | High             | Low            | Low            | Low            | Low        |
| Fossella, 2003            | Low            | High             | Low            | Low            | Low            | High       |
| Galetta, 2015             | Unclear        | High             | Low            | Low            | Low            | Low        |
| Gandhi, 2018              | Low            | Low              | Low            | Low            | Low            | High       |
| Garon, 2016               | Low            | High             | Low            | Low            | Low            | High       |
| Gebbia, 2010              | Low            | High             | Low            | Low            | Low            | Low        |
| Gebbia, 2003              | Unclear        | High             | Unclear        | Low            | Low            | Low        |
| Gronberg, 2009            | Low            | High             | Unclear        | Low            | Low            | High       |
| Harada, 2018              | Unclear        | High             | Low            | Low            | Low            | Unclear    |
| Helbekkmo, 2007           | Low            | High             | Low            | Low            | Low            | Low        |
| Hellmann, 2019            | Low            | High             | Low            | Low            | Low            | High       |
| Herbst, 2020              | Low            | High             | Low            | Low            | Low            | High       |
| Kader, 2013               | High envelope  | High             | Low            | Low            | Low            | Low        |
| Kaira, 2019               | Low            | High             | Low            | Low            | Low            | High       |
| Kawahara, 2013            | Low            | High             | Low            | Low            | Low            | Low        |
| Khodadad, 2014            | Unclear        | High             | Low            | Low            | Low            | High       |
| Kubota, 2015              | Low            | High             | Low            | Low            | Low            | High       |
| Langer, 2016              | Low            | High             | Unclear        | Low            | Low            | High       |
| Lee, 2020                 | Unclear        | Low              | Low            | Unclear        | Low            | High       |
| Martoni, 2005             | Unclear        | High             | Unclear        | Low            | Low            | Low        |
| Melosky, 2019             | Low            | High             | Low            | Low            | Low            | High       |
| Minami, 2013              | Unclear        | High             | Low            | Low            | Low            | Low        |
| Mok, 2019, NSq            | Low            | High             | Low            | Low            | Low            | High       |
| Niho, 2012                | Low            | High             | Low            | Low            | Low            | High       |
| Novell, 2017              | Low            | High             | Low            | Low            | Low            | High       |
| Ohe, 2007                 | Low            | High             | Low            | Low            | Low            | High       |
| Okamoto, 2010             | Low            | High             | Low            | Low            | Low            | High       |
| Papadimitrakopoulou, 2018 | Unclear        | High             | Unclear        | Unclear        | Low            | High       |
| Ouyang, 2018              | Low            | Low              | Low            | Low            | Low            | High       |
| Patel, 2013               | Unclear        | High             | Low            | Low            | Low            | High       |
| Paz-Ares, 2020            | Low            | Low              | Low            | Low            | Low            | High       |
| Ramalingam, 2017, NSq     | Low            | Low              | Low            | Low            | Low            | High       |
| Reck, 2009                | Unclear        | High             | Low            | Low            | Low            | High       |
| Rizvi, 2020               | Low            | High             | Low            | Low            | Low            | High       |
| Rodrigues, 2011           | Low            | High             | Low            | Low            | Low            | High       |
| Sandler, 2006             | Unclear        | High             | Low            | Low            | Low            | Low        |
| Scagliotti, 2008          | Low            | High             | Low            | Low            | High           | High       |
| Scagliotti, 2002          | Unclear        | High             | Low            | Low            | Low            | High       |
| Schiller, 2002            | Unclear        | High             | Low            | Low            | Low            | Low        |
| Smit, 2003                | Low            | High             | Low            | Low            | Low            | High       |
| Socinski, 2018            | Low            | High             | Unclear        | Low            | Low            | High       |
| Spigel, 2019              | Low            | Low              | Low            | Low            | Low            | High       |
| Sun, 2015                 | Unclear        | High             | Low            | Low            | Low            | High       |
| Tan, 2009                 | Low            | High             | Low            | Low            | Low            | Low        |
| Thomas, 2006              | Unclear        | High             | Low            | Low            | Low            | High       |
| Treat, 2010               | Unclear        | High             | Low            | Low            | Low            | High       |
| Von Pawel, 2018           | Low            | Low              | Low            | Low            | Low            | High       |
| West, 2019                | Low            | High             | Low            | Low            | Low            | High       |
| Wheatley, 2019            | Low            | High             | Low            | Low            | Low            | High       |
| Wu, 2020                  | Unclear        | High             | Low            | Low            | Low            | High       |
| Wu, 2014                  | Low            | High             | Low            | Low            | Low            | High       |
| Yang, 2012                | Unclear        | High             | Low            | High           | Low            | Low        |
| Yang, 2020                | Low            | Low              | Unclear        | Low            | Low            | High       |
| Zhang, 2013               | Low            | High             | Low            | Low            | Low            | High       |
| Zhou, 2015                | Low            | Low              | Low            | Low            | Low            | Low        |
| Zhou, 2020                | Low            | High             | Unclear        | Low            | Low            | High       |
| Zhu, 2018                 | Low            | High             | Unclear        | Low            | High           | Low        |
| Zinner, 2015              | Unclear        | High             | Low            | Low            | Low            | High       |

One study had a high risk of selection bias due to randomization using an envelope method, 59 studies had a high risk of performance bias due to a non-blinded study design, 1 study had a high risk of attrition bias because 21% of the randomized patients did not receive the assigned regimen, and 3 studies had a high risk of reporting bias because the primary endpoint was not specified. Forty-six studies were marked as having a high risk of other bias for potential conflicts of interest because the studies were directly funded or advised by pharmaceutical companies.

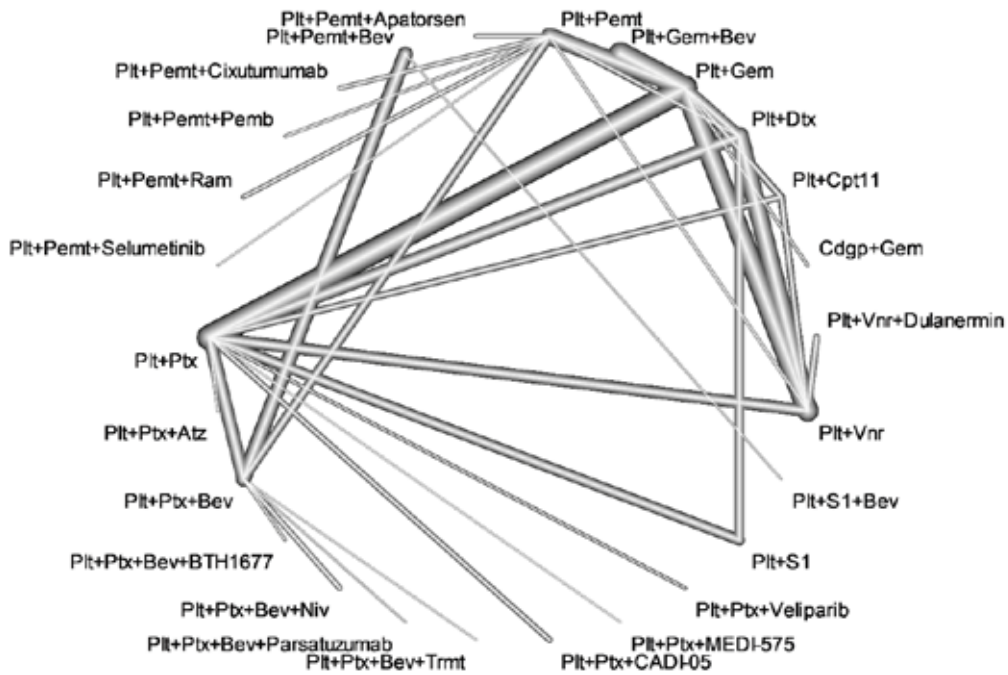

**Figure S1** Network diagram for the primary endpoint, HR for OS. Separate model, Whole network level ( $I^2=0\%$ ,  $P=0.8940$ , total;  $P=0.8940$ , within designs;  $P=0.9491$ , between designs;  $0.4876$ ). HR, hazard ratio; OS, overall survival; Plt, platinum regimen; Pemt, pemetrexed; Gem, gemcitabine; Dtx, docetaxel; Cpt11, irinotecan; Cdgp, nedaplatin; Vnr, vinorelbine; S1, tegafur gimeracil oteracil; Bev, bevacizumab; Ptx, paclitaxel; Trmt, tromethamine; Niv, nivolumab; Atz, atezolizumab; Ram, ramucirumab; Pemb, pembrolizumab.

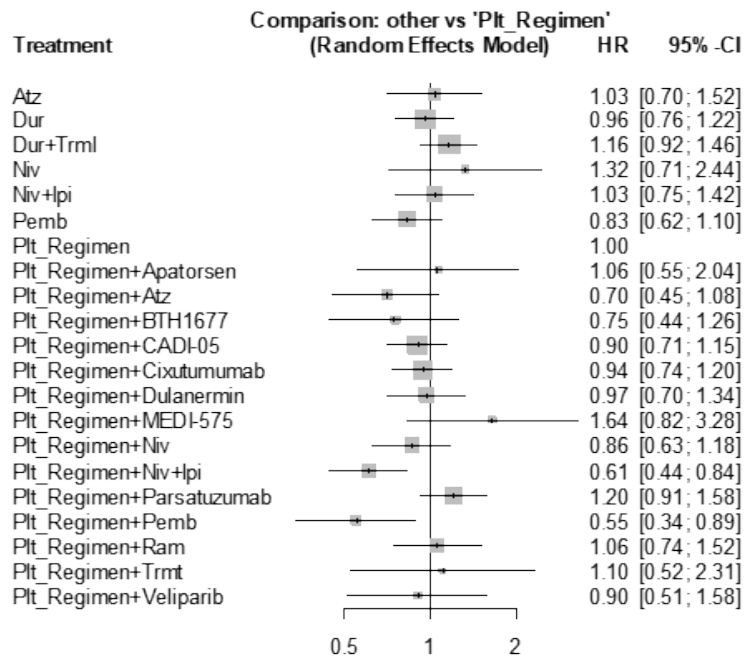

**Figure S2** Forest plots for primary outcomes (HR for OS) in main model that excepted conference abstracts. HR, hazard ratio; OS, overall survival; Plt, platinum regimen; Pemb, pembrolizumab; Niv, nivolumab; Ipi, ipilimumab; Dur, durvalumab; Trml, tremelimumab; Atz, atezolizumab; Trmt, tromethamine; Ram, ramucirumab; CI, confidence interval.

A

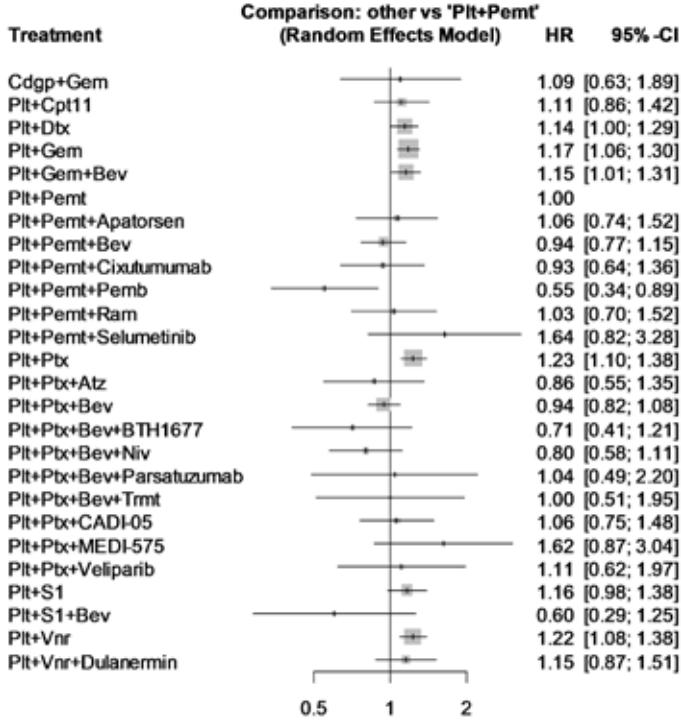

B

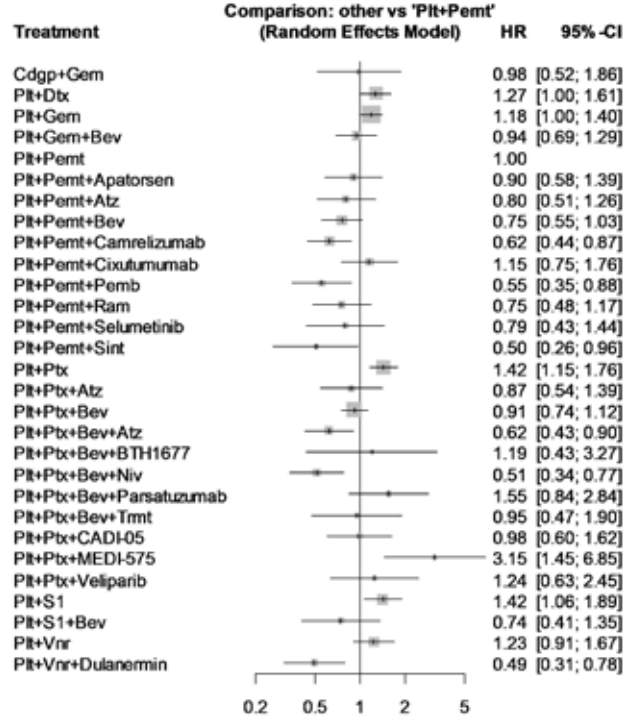

C

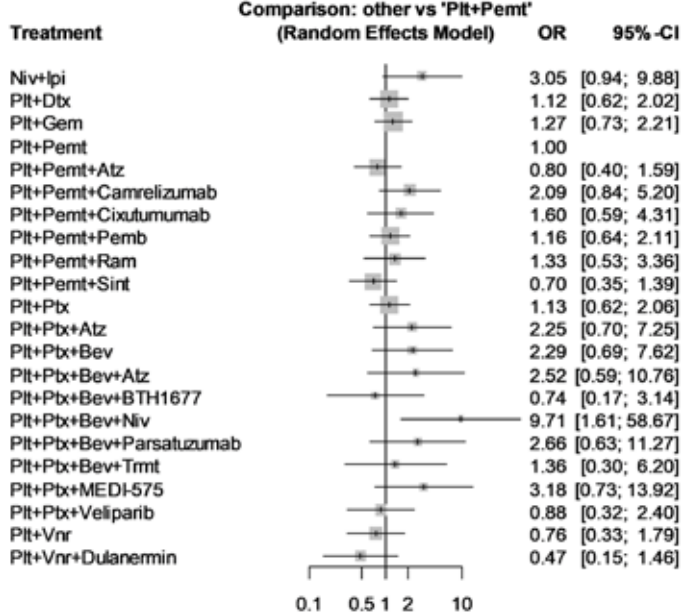

D

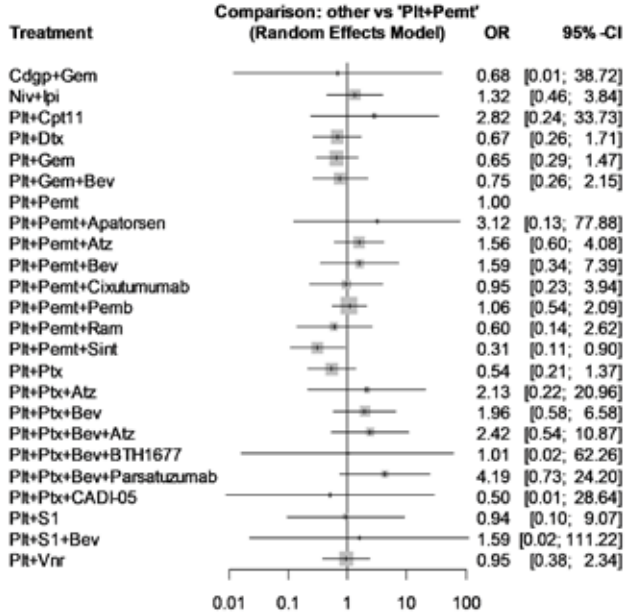

**Figure S3** Forest plots for primary and secondary outcomes in separate model. (A) HR for OS. (B) HR for PFS. (C) OR for adverse events ( $\geq$  grade 3). (D) OR for chemo related death. HR, hazard ratio; OS, overall survival; PFS, progression-free survival; OR, odds ratio; Cdgp, nedaplatin; Gem, gemcitabine; Plt, platinum regimen; Cpt11, irinotecan; Dtx, docetaxel; Bev, bevacizumab; Pemt, pemetrexed; Pemb, pembrolizumab; Ram, ramucirumab; Ptx, paclitaxel; Atz, atezolizumab; Niv, nivolumab; Trmt, tromethamine; S1, tegafur gimeracil oteracil; Vnr, vinorelbine; Sint, sintilimab; CI, confidence interval.
